# Supplementary material
Source: PubMed Central journal article supplement (PMC4959162)
Supplement: AEM.00478-16_zam999117205so1.pdf [file AEM.00478-16_zam999117205so1.pdf]

## Supplemental Material

Li et al. “Ultrastructural and single-cell level characterization reveals metabolic versatility in a microbial eukaryote community from an ice-covered Antarctic lake”

### Supplemental Figure Legends

Figure S1. Confocal microscopic images of *Isochrysis sp.* MDV isolates without LysoTracker Green staining. a. green channel; b, DIC image; c, chlorophyll autofluorescence; d, overlays of a – c. Bars indicate 5  $\mu$ m.

Figure S2. Confocal microscopic images of *Chlamydomonas sp.* ICE-MDV isolates without LysoTracker Green staining. a. green channel; b, DIC image; c, chlorophyll autofluorescence; d, overlays of a – c. Bars indicate 5  $\mu$ m.

Figure S3. Heat map of communities associated with sorted eukaryotic organisms based on 16s rRNA sequence abundance. 16s OTUS were identified to phylum level. Color code on the left indicates the abundance of sequence of each phylum. Color code on the right side represent high chlorophyll autofluorescence (red), high LysoTracker fluorescence (green) or intermediate of either (blue) of the eukaryotic organisms. The communities associated with heterotrophic organisms were predominated by chloroplasts of phytoplankton (blue box), indicating that they were the potential prey of the heterotrophic eukaryotes.

Table S1. Basic growth physiology of *Chlamydomonas* sp. ICE-MDV and *Isochrysis* sp. MDV isolates.

| Organism                         | Growth Media | Growth Temperature Range (°C) | Growth Irradiance Range ( $\mu\text{mol m}^{-2} \text{s}^{-1}$ ) | Organic Carbon                    |
|----------------------------------|--------------|-------------------------------|------------------------------------------------------------------|-----------------------------------|
| <i>Chlamydomonas</i> sp. ICE-MDV | Bolds        | 2 - 15                        | 5 - 500                                                          | None                              |
| <i>Isochrysis</i> sp. MDV        | L1/2, f/2    | 2 - 10                        | 0 - 50                                                           | cereal grass, rice, yeast extract |

Table S2. Diversity of major algal classes in Lake Bonney enrichment cultures. Algal diversity was determined by spectral chlorophyll a fluorescence (bbe FluoroProbe). Enrichment used in this study is highlighted.

| Enrichment Name | Lake | Depth (m) | Medium  | Algal Class ( $\mu\text{g Chl a L}^{-1}$ ) |              |              |               |
|-----------------|------|-----------|---------|--------------------------------------------|--------------|--------------|---------------|
|                 |      |           |         | <i>Green</i>                               | <i>Cyano</i> | <i>Hapto</i> | <i>Crypto</i> |
| 73.1            | ELB  | 6         | F/2     | 58.90                                      | 0.00         | 5.78         | 1.38          |
| 74.1            | ELB  | 6         | DYV     | 21.33                                      | 0.25         | 0.00         | 3.09          |
| 75.1            | ELB  | 6         | BBM     | 26.06                                      | 0.35         | 2.00         | 0.00          |
| 76.1            | ELB  | 6         | F/2     | 26.00                                      | 0.16         | 1.32         | 1.17          |
| 77.1            | ELB  | 6         | 10% DYV | 46.04                                      | 0.00         | 0.00         | 1.13          |
| 78.1            | ELB  | 6         | BBM     | 17.98                                      | 0.26         | 0.00         | 1.08          |
| 79.1            | ELB  | 6         | F/2     | 22.01                                      | 0.34         | 1.32         | 0.00          |
| 80.1            | ELB  | 6         | DYV     | 18.30                                      | 0.36         | 0.00         | 4.73          |
| 81.1            | ELB  | 6         | 10% BBM | 48.34                                      | 0.00         | 5.44         | 1.80          |
| 82.1            | ELB  | 6         | 10% F/2 | 29.81                                      | 0.00         | 2.07         | 1.40          |
| 83.1            | ELB  | 6         | 10% DYV | 34.04                                      | 0.00         | 0.00         | 1.17          |
| 84.1            | ELB  | 13        | BBM     | 51.53                                      | 0.00         | 19.88        | 1.12          |
| 85.1            | ELB  | 13        | F/2     | 47.35                                      | 0.00         | 38.76        | 0.89          |
| 86.1            | ELB  | 13        | DYV     | 125.29                                     | 0.00         | 43.31        | 0.00          |
| 87.1            | ELB  | 13        | 10% F/2 | 60.43                                      | 0.00         | 46.42        | 6.41          |
| 88.1            | ELB  | 13        | 10% BBM | 25.53                                      | 0.00         | 12.49        | 0.21          |
| 89.1            | ELB  | 13        | 10% DYV | 20.67                                      | 0.00         | 18.86        | 0.12          |
| 90.1            | ELB  | 13        | BBM     | 85.55                                      | 0.00         | 22.05        | 0.00          |
| 91.1            | ELB  | 13        | F/2     | 68.49                                      | 0.00         | 137.60       | 1.04          |
| 92.1            | ELB  | 13        | DYV     | 42.25                                      | 0.00         | 0.59         | 0.44          |
| 93.1            | ELB  | 13        | 10% BBM | 37.90                                      | 0.00         | 20.13        | 0.85          |
| 94.1            | ELB  | 13        | 10% F/2 | 16.77                                      | 0.00         | 12.63        | 0.00          |
| 95.1            | ELB  | 13        | 10% DYV | 6.68                                       | 0.00         | 6.04         | 0.16          |

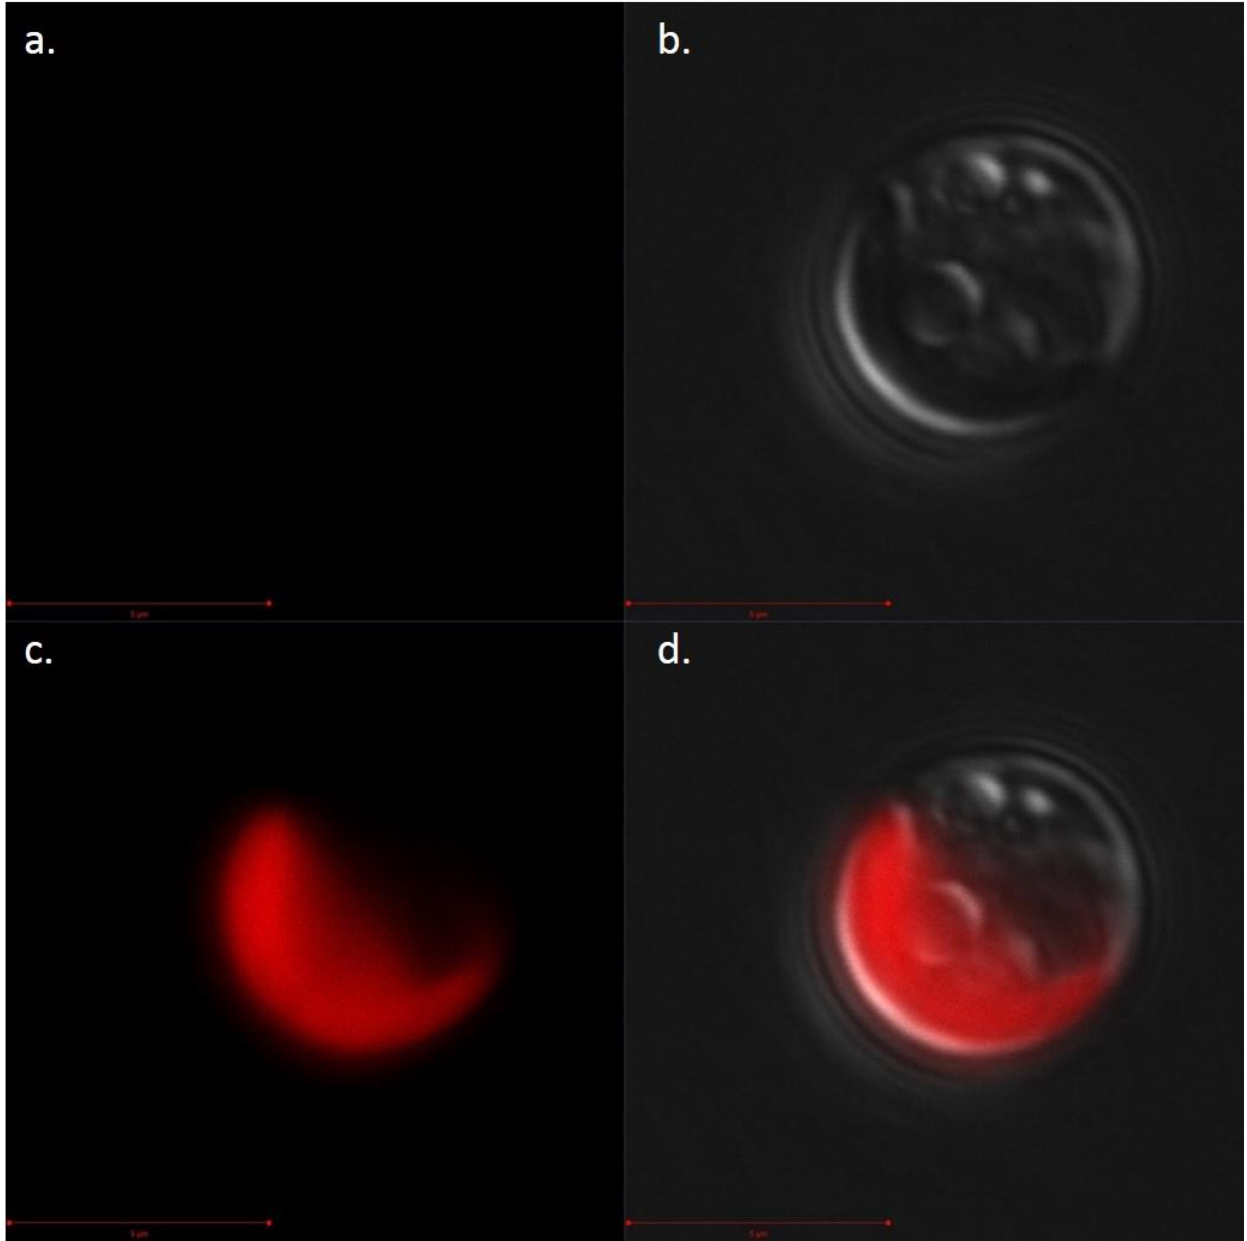

Figure S1

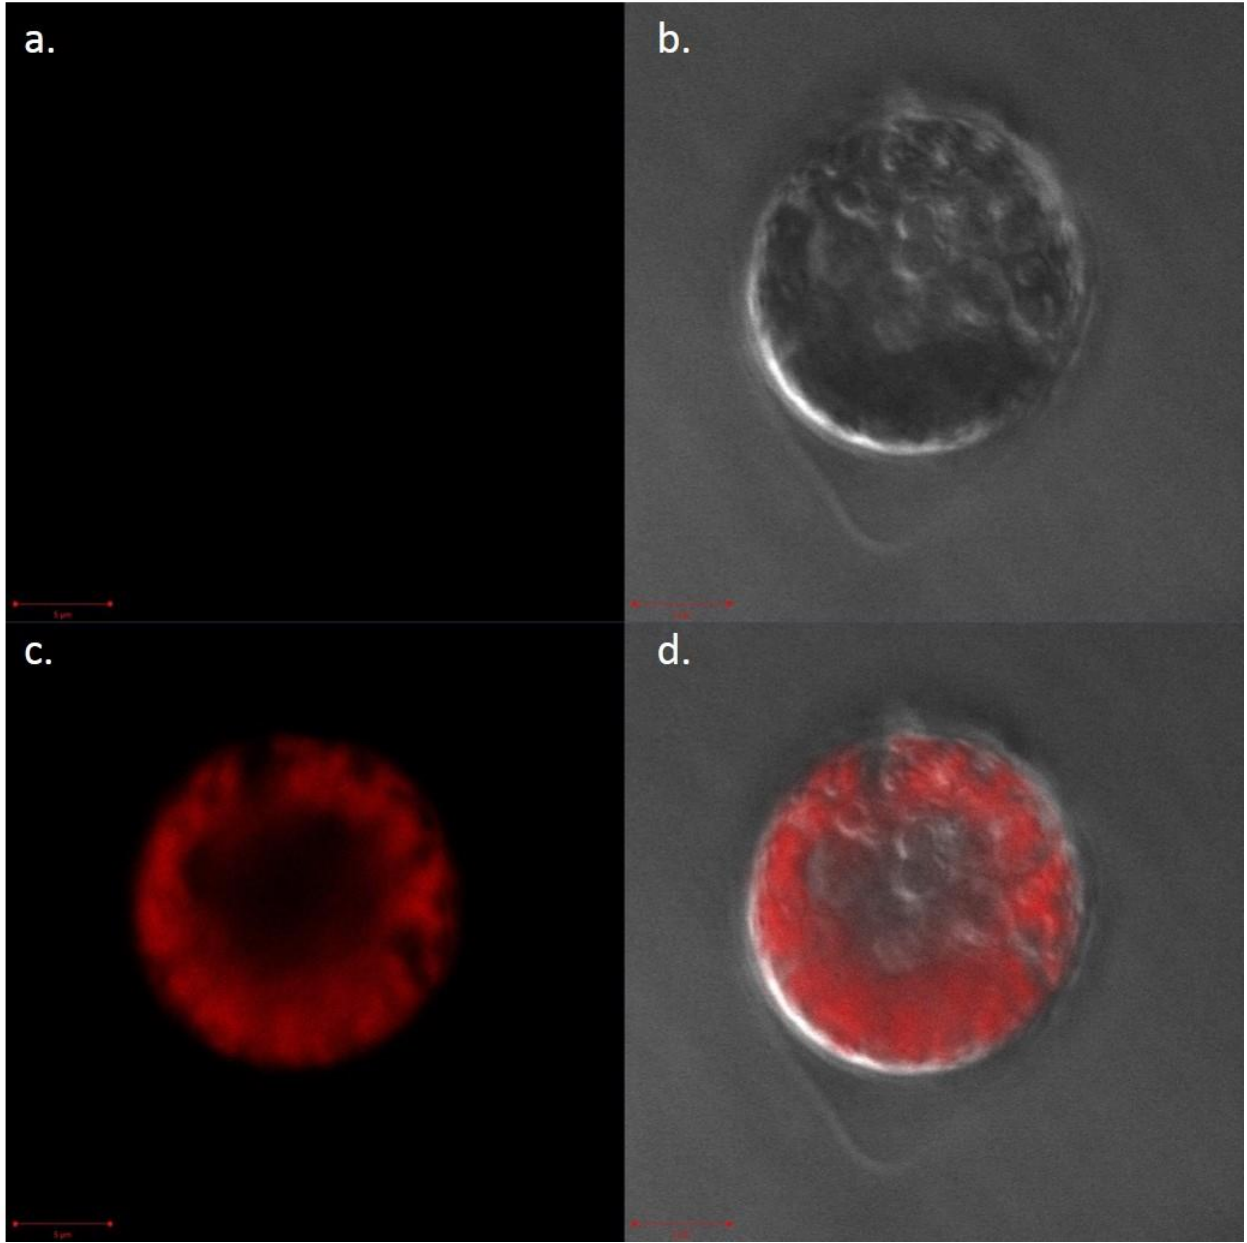

Figure S2

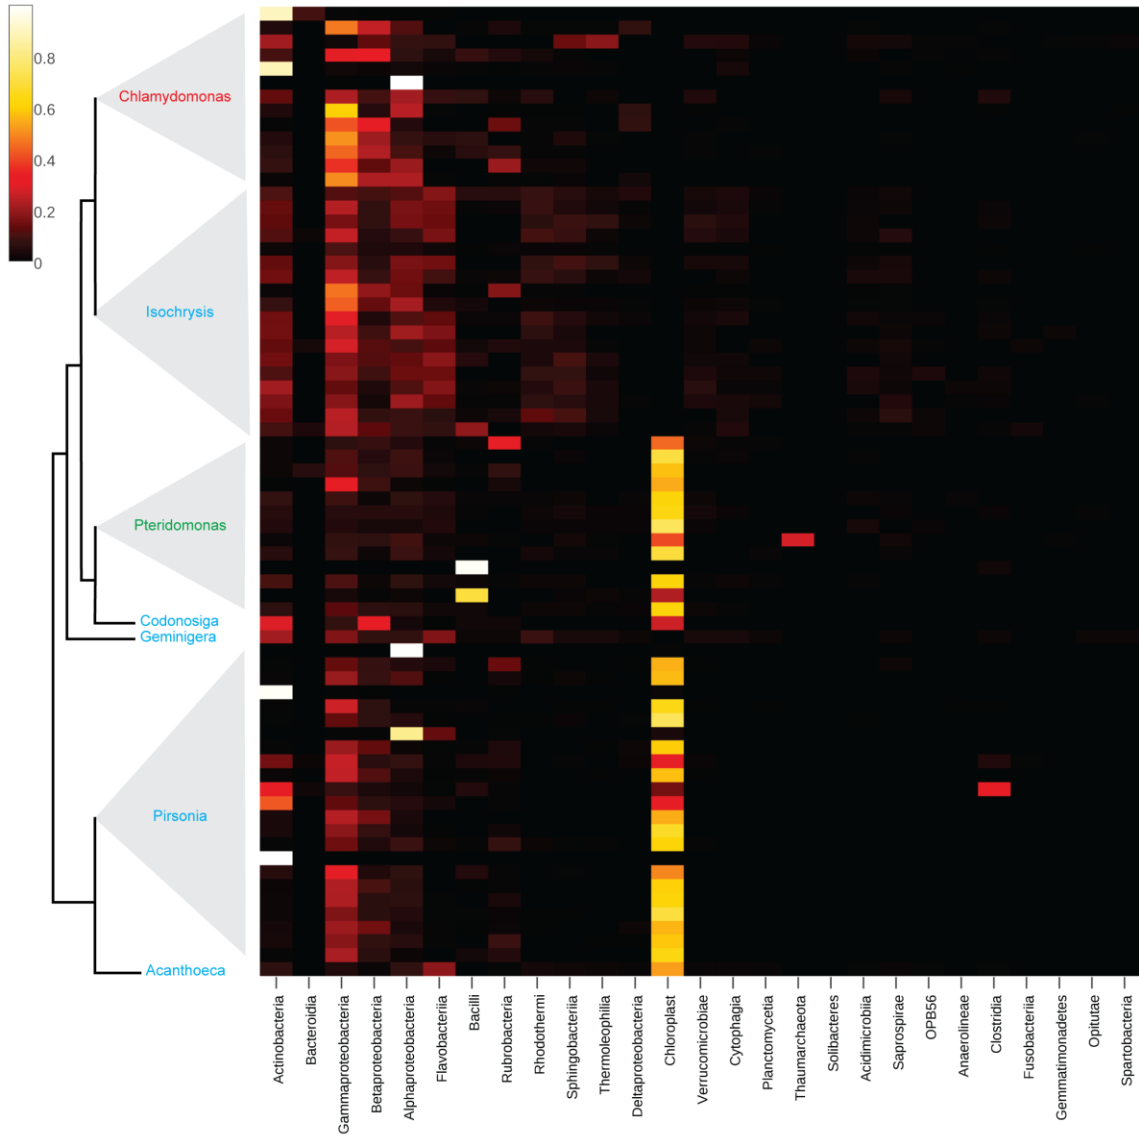

Figure S3
